# Supplementary material for: Modulating the Microbiome and Immune Responses Using Whole Plant Fibre in Synbiotic Combination with Fibre-Digesting Probiotic Attenuates Chronic Colonic Inflammation in Spontaneous Colitic Mice Model of IBD
Source: PubMed Central journal article supplement (PMC7468978; doi:10.3390/nu12082380), 2020-08-09
Supplement: nutrients-12-02380-s001.pdf [file nutrients-12-02380-s001.pdf]

# Modulating the microbiome and immune responses using whole plant fibre in synbiotic combination with fibre-digesting probiotic attenuates chronic colonic inflammation in spontaneous colitic mice model of IBD

**Authors:** Tanvi Shinde<sup>1,2\*</sup>, Ravichandra Vemuri<sup>2,3</sup>, Sonia Shastri<sup>2</sup>, Agampodi Promoda Perera<sup>2</sup>, Shakuntla V. Gondalia<sup>4,5</sup>, David J. Beale<sup>6</sup>, Avinash V. Karpe<sup>6</sup>, Rajaraman Eri<sup>2</sup>, Roger Stanley<sup>1\*</sup>

<sup>1</sup>Centre for Food Innovation, Tasmanian Institute of Agriculture, University of Tasmania, Launceston, Tasmania 7250 Australia.

<sup>2</sup>Gut Health Research Group, School of Health Sciences, College of Health and Medicine, University of Tasmania, Launceston, Tasmania 7250 Australia.

<sup>3</sup>Department of Pathology, Wake Forest School of Medicine, Medical Center Boulevard, Winston-Salem NC 27157, USA.

<sup>4</sup>Centre for Human Psychopharmacology, Swinburne University of Technology, Hawthorn, Victoria, Australia.

<sup>5</sup>Health and Biosecurity, Commonwealth Scientific and Industrial Research Organization (CSIRO), Gate 13 Kintore Avenue 5000, South Australia, Australia.

<sup>6</sup>Land and Water, Commonwealth Scientific and Industrial Research Organization (CSIRO), Ecosciences Precinct, Dutton Park 4102, Queensland, Australia.

**\*Correspondence:** Tanvi Shinde

Email: [tanvi.shinde@utas.edu.au](mailto:tanvi.shinde@utas.edu.au)

Phone: +61 4 79107345

Roger Stanley

Email: [roger.stanley@utas.edu.au](mailto:roger.stanley@utas.edu.au)

Phone: +61 4 34565167

**Keywords:** Synbiotic, Prebiotic, Probiotic, IBD, *Bacillus* spores, whole plant sugarcane fibre, SCFAs, dysbiosis, gut microbiota

A.

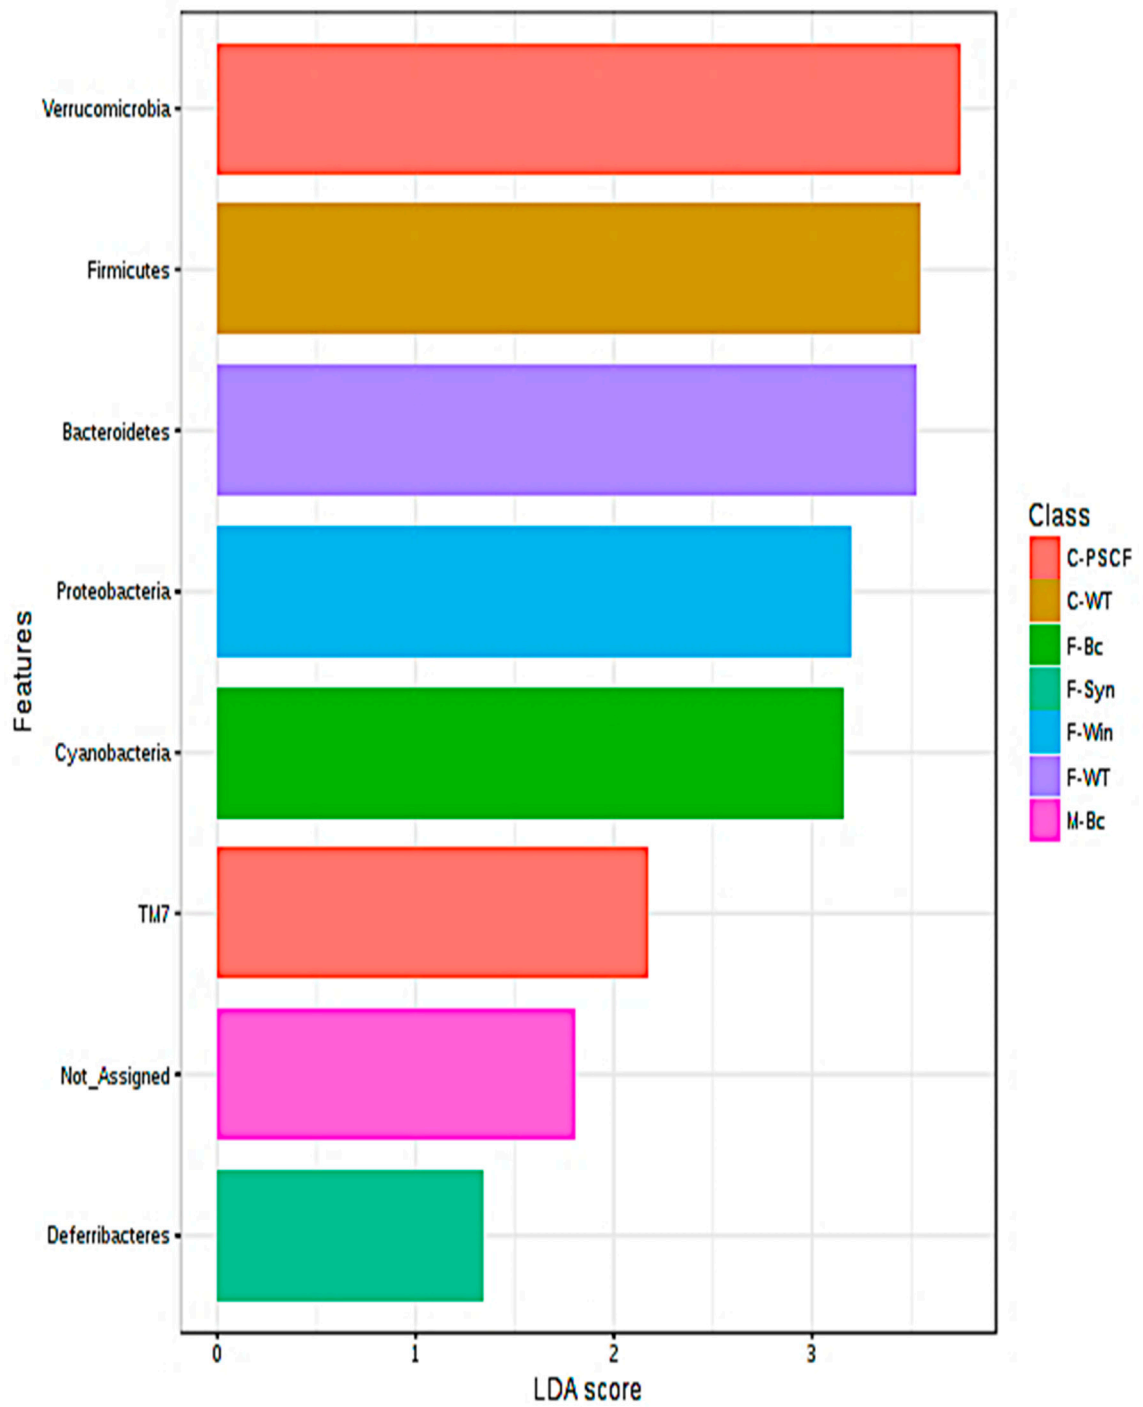

B.

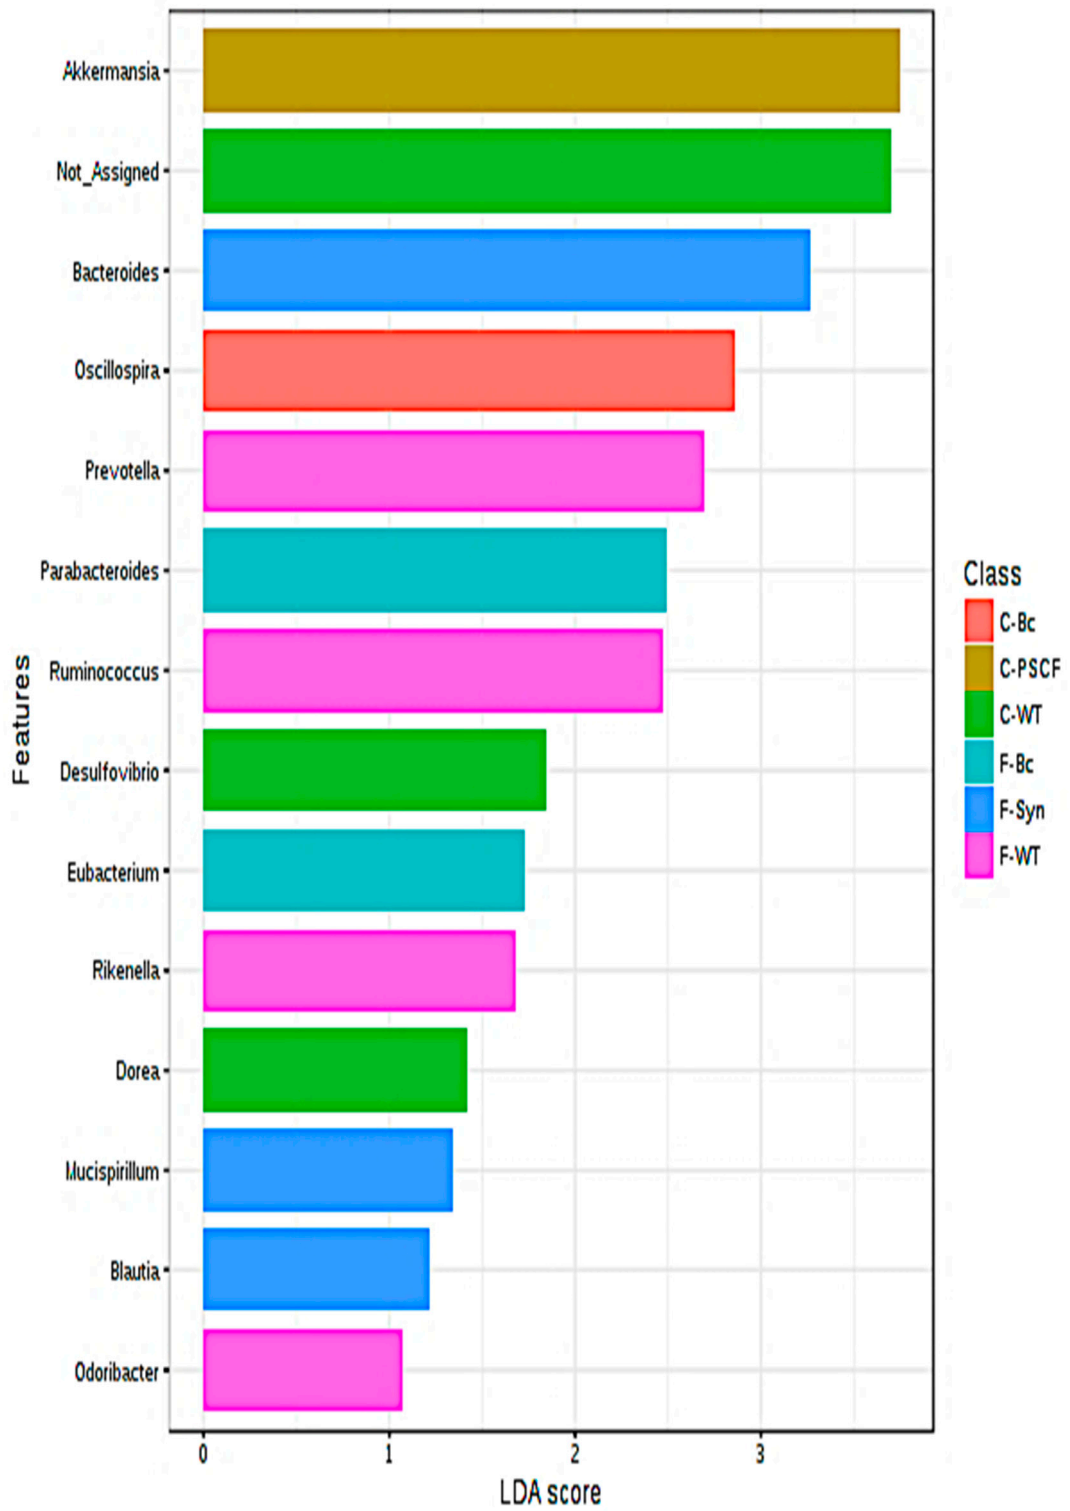

C.

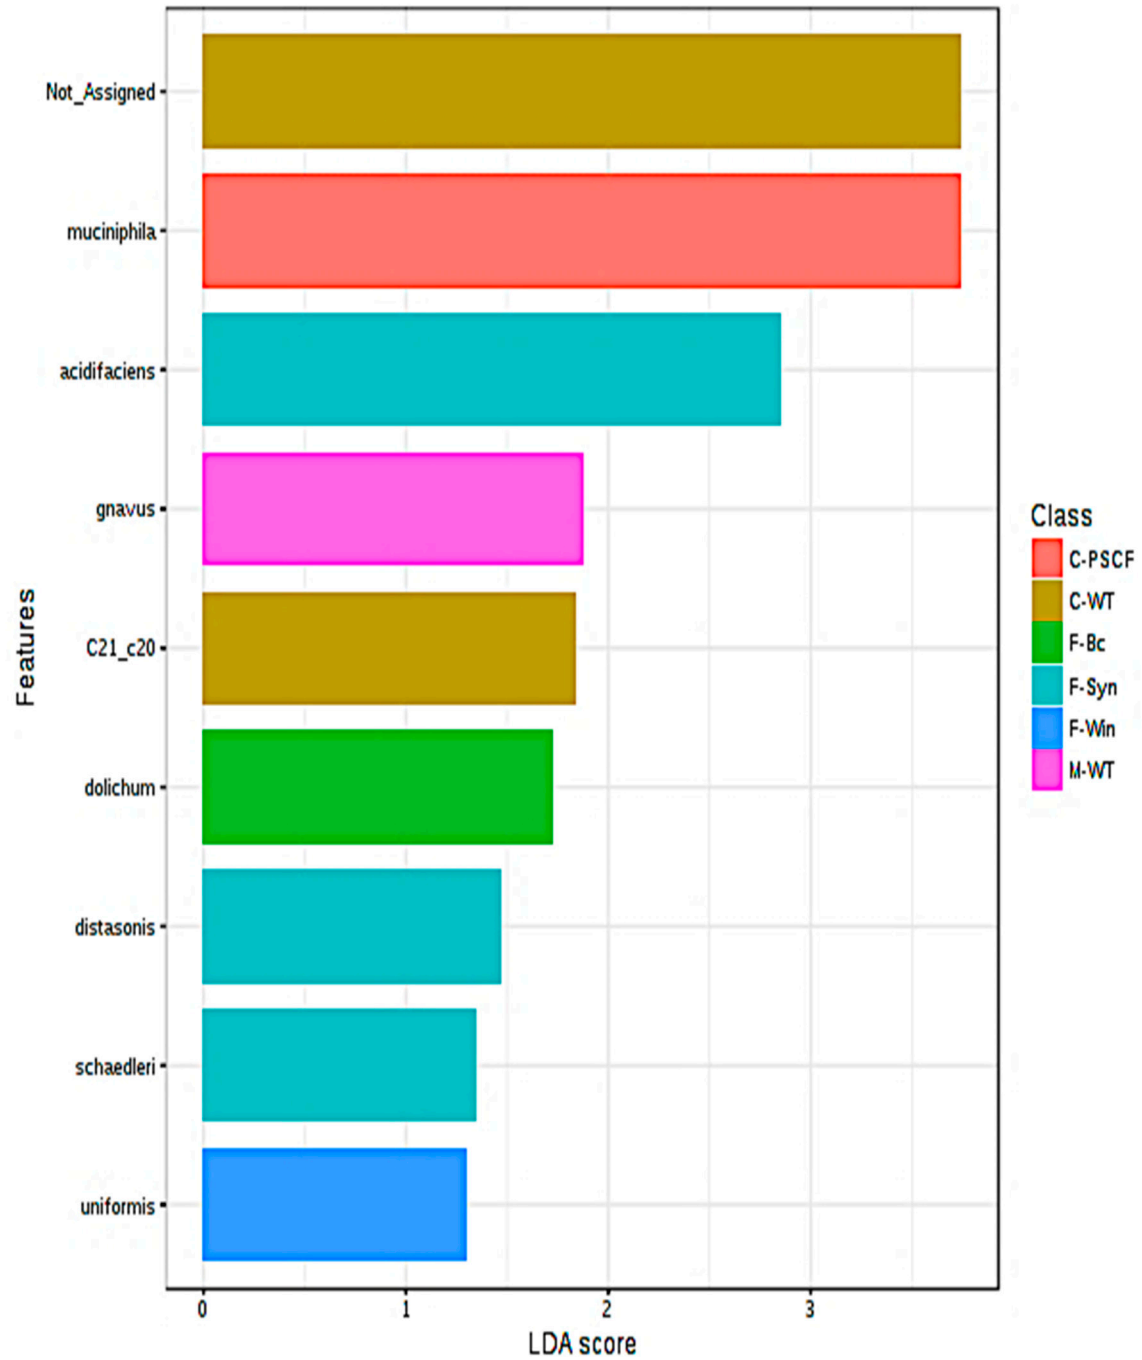

**Figure S1. Biomarker analysis with Linear Discriminant Analysis (LDA) Effect Size (LEfSe) scoring plot using Kruskal-Wallis rank sum test** ( $p = 0.01$  and log LDA threshold cut-off value = 1.0). Wild-type (WT), Winnie-control (Win), *B. coagulans* (Bc) spores, PSCF and symbiotic (Syn) groups at phylum (A), genus (B) and species (C) level. C-caecal, M-mucosal-associated, F-faecal.

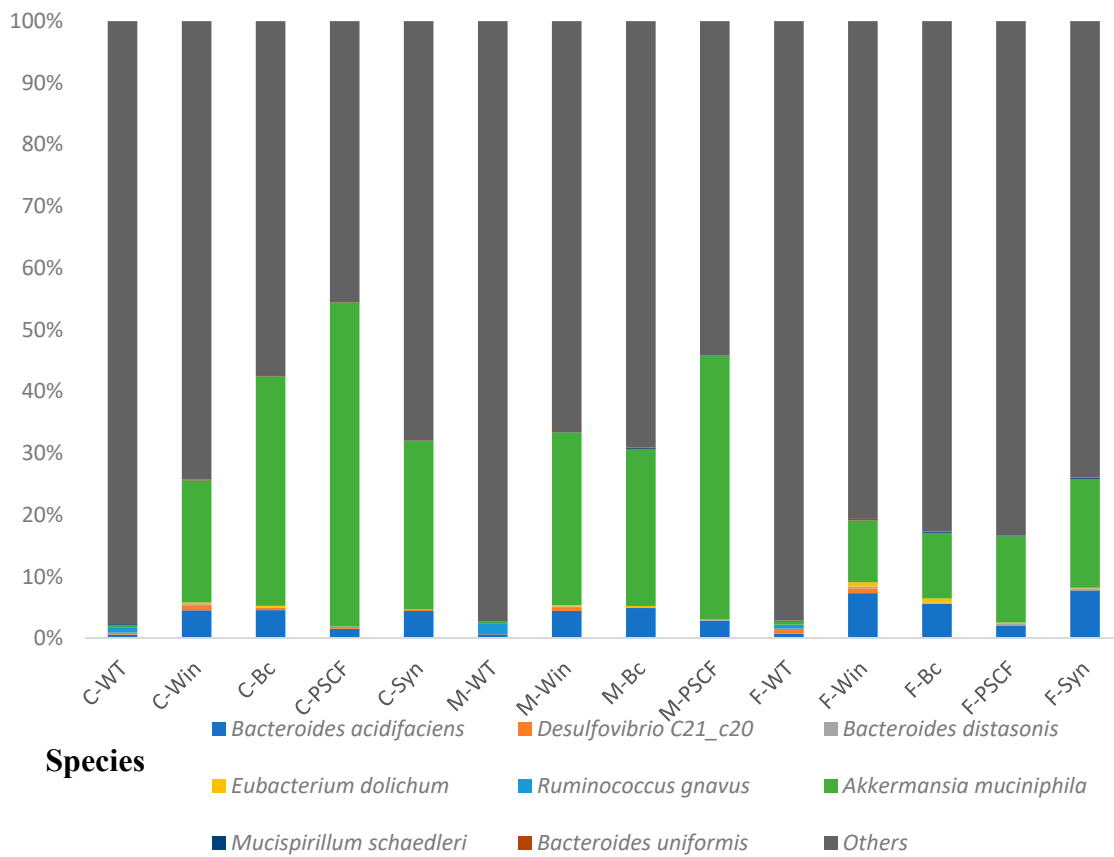

**Figure S2. Relative abundances (%) of caecal (C)-, mucosal (M)- and Faecal (F)- associated microbiota at species level.** Wild-type (WT), Winnie-control (Win), *B. coagulans* (Bc) spores, PSCF and Synbiotic (Syn) groups; ( $n = 5$  per group).

**Table S1. Nutritional information of Kfibre™ Prebiotic Sugarcane Fibre**

| Nutrient information of of Kfibre™ Prebiotic Sugarcane Fibre <sup>a</sup><br>(quantity per 100gm)                                     |        |
|---------------------------------------------------------------------------------------------------------------------------------------|--------|
| Energy                                                                                                                                | 950 kj |
| Protein                                                                                                                               | 1.9 g  |
| Total fat                                                                                                                             | 3.1 g  |
| -Saturated                                                                                                                            | 1 g    |
| Carbohydrates                                                                                                                         | 92.5 g |
| -Sugars                                                                                                                               | 8.1 g  |
| Dietary fibre                                                                                                                         | 84.5 g |
| Sodium                                                                                                                                | 30 mg  |
| <sup>a</sup> Ingredients: Sugarcane (sucrose reduced).<br>Information sourced from <a href="http://www.kfibre.com">www.kfibre.com</a> |        |

**Table S2. Nutritional information of mice standard chow diet**

| Nutrient information of standard rodent chow diet - Barastoc Mice Cubes <sup>a</sup>                                                                                                                                                                                                                                                                                                                                   |            |             |            |
|------------------------------------------------------------------------------------------------------------------------------------------------------------------------------------------------------------------------------------------------------------------------------------------------------------------------------------------------------------------------------------------------------------------------|------------|-------------|------------|
| Minimal crude protein                                                                                                                                                                                                                                                                                                                                                                                                  | 20 %       | Vitamin A   | 15 IU/g    |
| Minimal crude fat                                                                                                                                                                                                                                                                                                                                                                                                      | 6 %        | Vitamin D3  | 2 IU/g     |
| Crude fibre                                                                                                                                                                                                                                                                                                                                                                                                            | 3.2 %      | Vitamin E   | 260 mg/kg  |
| Acid detergent fibre                                                                                                                                                                                                                                                                                                                                                                                                   | 4.4 %      | Vitamin K3  | 55 mg/kg   |
| Neutral detergent fibre                                                                                                                                                                                                                                                                                                                                                                                                | 10.4 %     | Vitamin B1  | 64 mg/kg   |
| Digestible energy                                                                                                                                                                                                                                                                                                                                                                                                      | 12.8 MJ/kg | Vitamin B2  | 48 mg/kg   |
| Calcium                                                                                                                                                                                                                                                                                                                                                                                                                | 1.14 %     | Vitamin B6  | 30 mg/kg   |
| Phosphorus                                                                                                                                                                                                                                                                                                                                                                                                             | 0.94 %     | Vitamin B12 | 0.08 mg/kg |
| Sodium                                                                                                                                                                                                                                                                                                                                                                                                                 | 0.35 %     | Niacin      | 400 mg/kg  |
| Potassium                                                                                                                                                                                                                                                                                                                                                                                                              | 0.82 %     | Panto       | 220 mg/kg  |
| Chloride                                                                                                                                                                                                                                                                                                                                                                                                               | 0.58 %     | Biotin      | 1.48 mg/kg |
| Magnesium                                                                                                                                                                                                                                                                                                                                                                                                              | 0.24 %     | Folic       | 11 mg/kg   |
| Lysine                                                                                                                                                                                                                                                                                                                                                                                                                 | 1.11 %     | Iron        | 51 mg/kg   |
| Methionine                                                                                                                                                                                                                                                                                                                                                                                                             | 0.37 %     | Zinc        | 60 mg/kg   |
| Linoleic                                                                                                                                                                                                                                                                                                                                                                                                               | 1.52 %     | Manganese   | 120 mg/kg  |
| Starch                                                                                                                                                                                                                                                                                                                                                                                                                 | 29 %       | Copper      | 10 mg/kg   |
| Vitamin A                                                                                                                                                                                                                                                                                                                                                                                                              | 15 IU/g    | Selenium    | 0.1 mg/kg  |
| Vitamin D3                                                                                                                                                                                                                                                                                                                                                                                                             | 2 IU/g     | Molybdenum  | 0.4 mg/kg  |
| Vitamin E                                                                                                                                                                                                                                                                                                                                                                                                              | 260 mg/kg  | Cobalt      | 0.6 mg/kg  |
| Vitamin K3                                                                                                                                                                                                                                                                                                                                                                                                             | 55 mg/kg   | Iodine      | 1.4 mg/kg  |
| <sup>a</sup> Ingredients include: wheat, wheat byproducts, groats (dehulled oats), meat meal, canola oil, soyabean meal, skim milk powder, molasses, salt, vitamins, trace minerals. The product is a complete and balanced diet to support the growth and health of mice and rats in laboratory environment.<br>Information sourced from <a href="http://www.ridley.com.au">www.ridley.com.au</a> Product code 102108 |            |             |            |
